# Supplementary material for: Barium acetate as an additive for high performance perovskite solar cells
Source: Royal Society of Chemistry journal article supplement (doi:10.1039/c9tc04067f), 2019-01-01
Supplement: c9tc04067f1.pdf [file c9tc04067f1.pdf]

## Supporting Information

### **Barium Acetate as an Additive for high Performance Perovskite Solar Cell**

Yueming Wang,<sup>a,b</sup> Yulei Wu,<sup>b</sup> Sheng Fu,<sup>b</sup> Changjian Song,<sup>b</sup> Li Wan,<sup>b</sup> Wenxiao Zhang,<sup>b</sup>  
Xiaodong Li,<sup>b</sup> Weiguang Yang,<sup>a</sup> Weijie Song,<sup>b</sup> and Junfeng Fang <sup>\*b,c</sup>

<sup>a</sup> Department of Electronic Information Materials, School of Materials Science and Engineering, Shanghai University, Shanghai, 200444, China

<sup>b</sup> Ningbo Institute of Materials Technology and Engineering, Chinese Academy of Sciences, Ningbo, 315201, China

<sup>c</sup> School of Physics and Electronics Science, Ministry of Education Nanophotonics & Advanced Instrument Engineering Research Center, East China Normal University, Shanghai 200062, China

E-mail: [jffang@phy.ecnu.edu.cn](mailto:jffang@phy.ecnu.edu.cn)

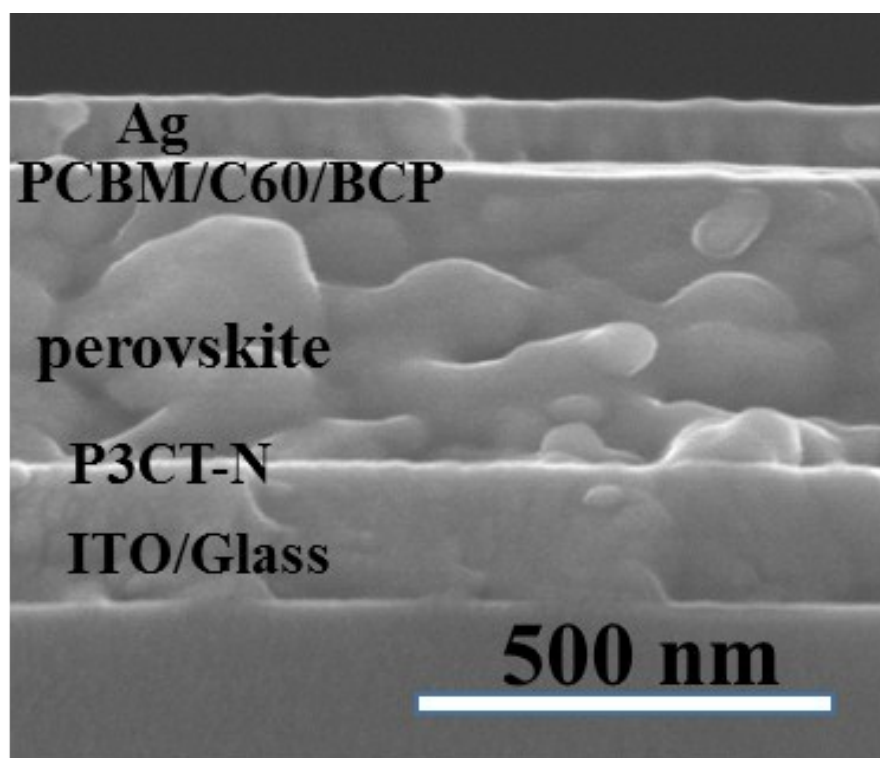

**Figure S1.** Cross-sectional SEM image of the PSC.

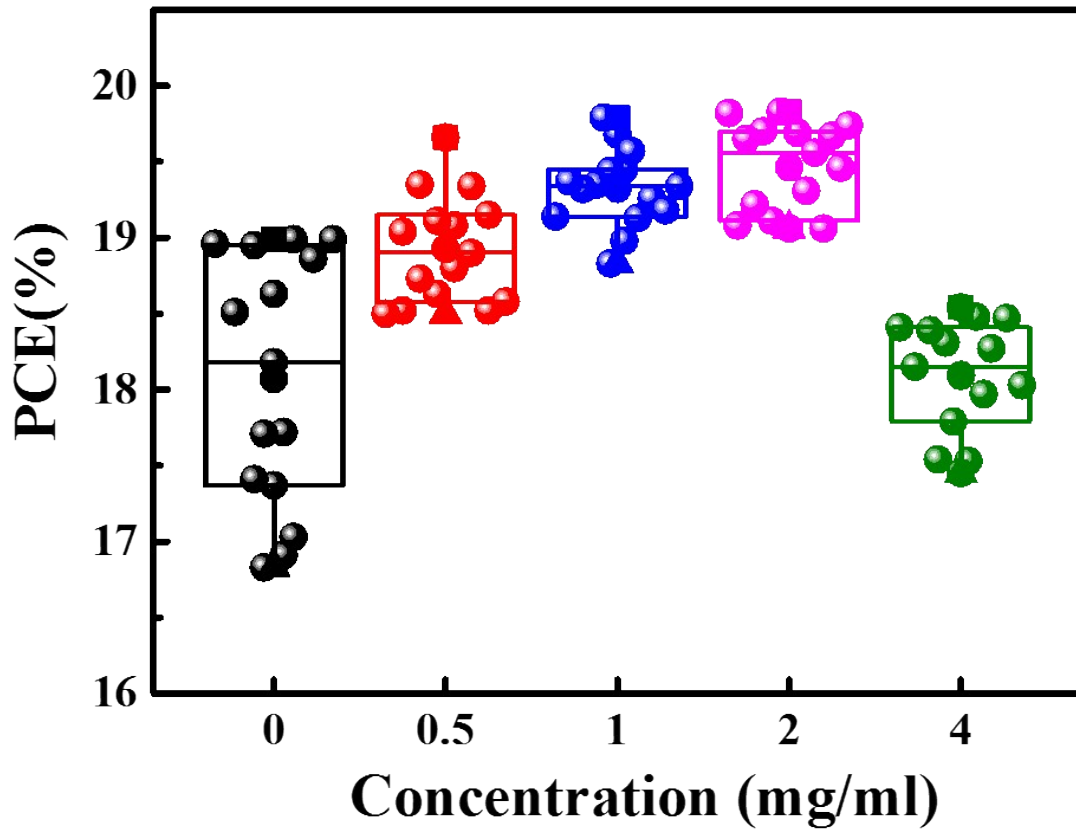

**Figure S2.** PCE statistics based on 15 separated devices of different BaAc<sub>2</sub> doping concentration.

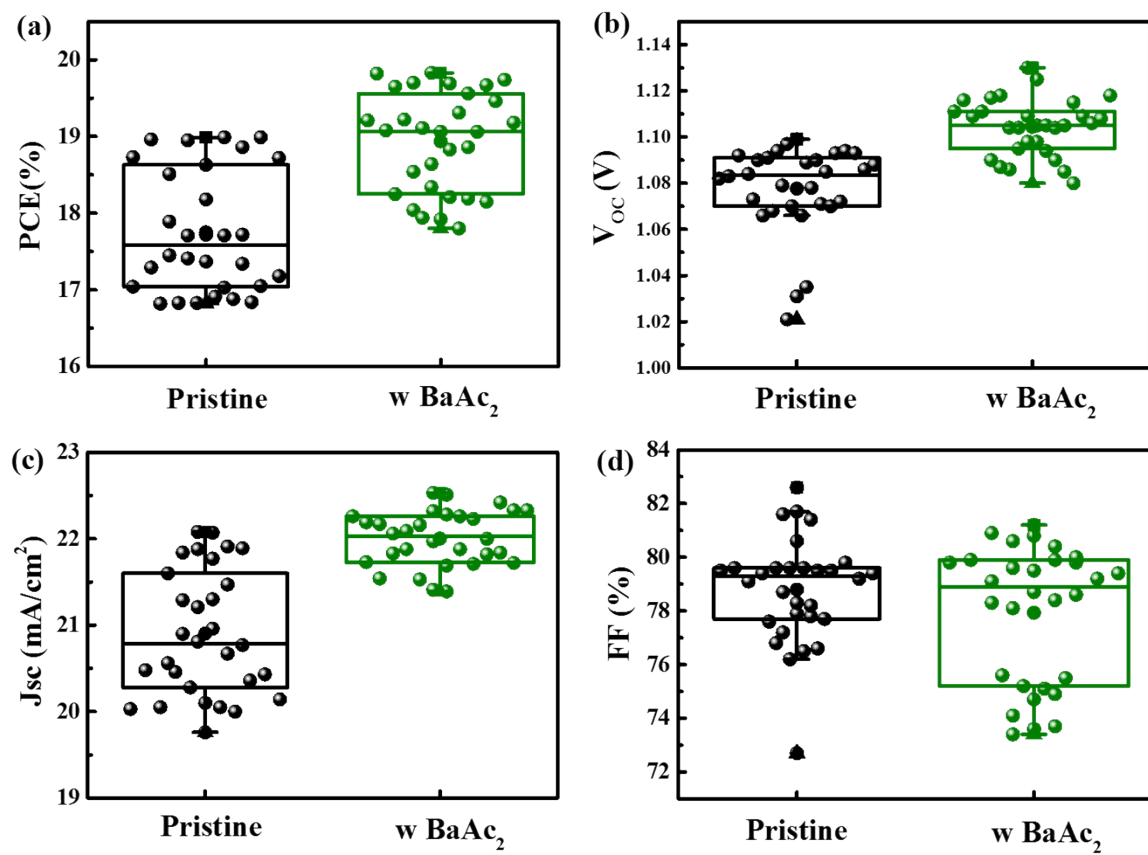

**Figure S3.** The  $J-V$  metrics for 30 separated PSCs based on pristine MAPbI<sub>3</sub> and BaAc<sub>2</sub> doping samples.

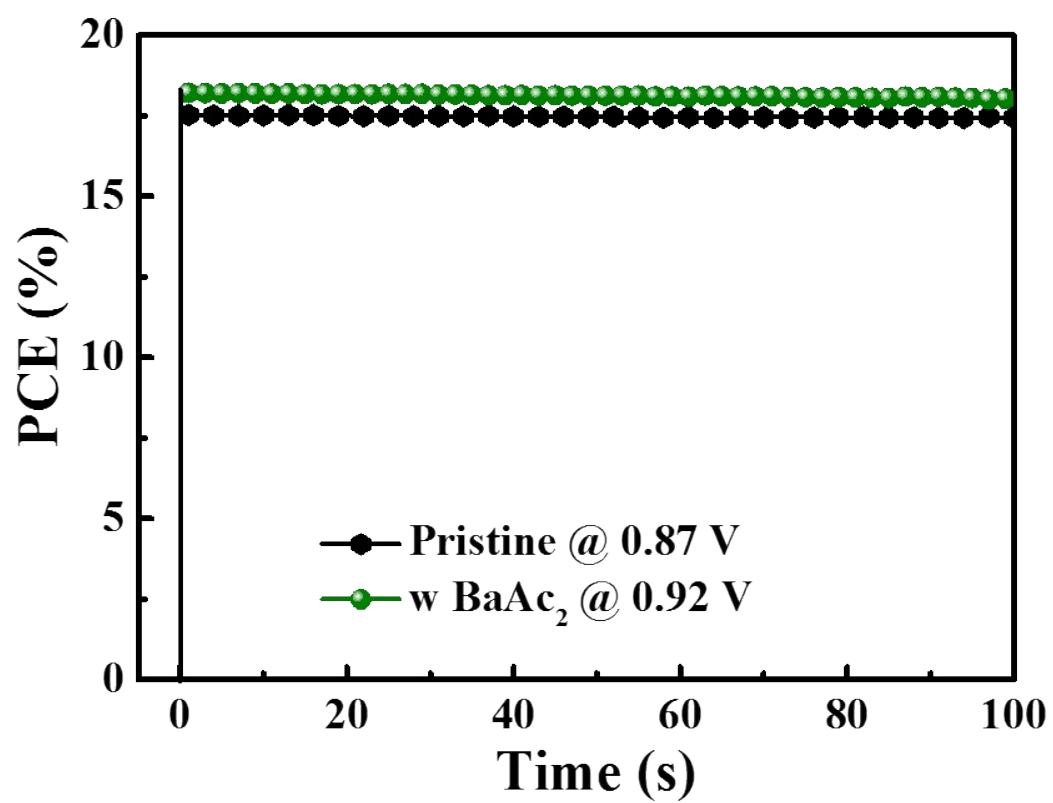

**Figure S4.** Max power point output of the devices with and without BaAc<sub>2</sub>.

**Table S1.** Fitting parameters for time-resolved photoluminescence (TRPL) based on perovskite films with and without BaAc<sub>2</sub>.

| Samples             | $\tau_{\text{ava}}$ (ns) | $\tau_1$ (ns) | $\tau_2$ (ns) | $A_1$ | $A_2$ |
|---------------------|--------------------------|---------------|---------------|-------|-------|
| pristine            | 16.50                    | 6.09          | 19.06         | 0.445 | 0.579 |
| w BaAc <sub>2</sub> | 33.40                    | 7.08          | 36.81         | 0.409 | 0.605 |
